# Supplementary material for: A bimetallic Ag15Cu12(S-c-C6H11)18(CH3COO)3 nanocluster featuring an irregular Ag12 kernel
Source: Royal Society of Chemistry journal article supplement (doi:10.1039/d2dt03423a), 2022-12-17
Supplement: d2dt03423a1.pdf [file d2dt03423a1.pdf]

## A bimetallic $\text{Ag}_{15}\text{Cu}_{12}(\text{S-c-C}_6\text{H}_{11})_{18}(\text{CH}_3\text{COO})_3$ nanocluster featuring an irregular $\text{Ag}_{12}$ kernel

Zhenzhen Lin,<sup>a,b</sup> Ting Zhang,<sup>a,b</sup> Cao Fang,<sup>a,b</sup> Shan Jin,<sup>b,c</sup> Chang Xu,<sup>a</sup> Daqiao Hu,<sup>\*a,b</sup> and Manzhou Zhu<sup>\*a,b</sup>

<sup>a</sup>Department of Chemistry and Centre for Atomic Engineering of Advanced Materials, Anhui Province Key Laboratory of Chemistry for Inorganic/Organic Hybrid Functionalized Materials, Anhui University, Hefei, Anhui, People's Republic of China.

<sup>b</sup>Key Laboratory of Structure and Functional Regulation of Hybrid Materials, Anhui University, Ministry of Education, Hefei, Anhui, People's Republic of China.

<sup>c</sup>Institutes of Physical Science and Information Technology, Anhui University, Hefei, Anhui, People's Republic of China.

\*E-mail: hudaqiao@ahu.edu.cn (D. H.); z mz@ahu.edu.cn (M. Z.)

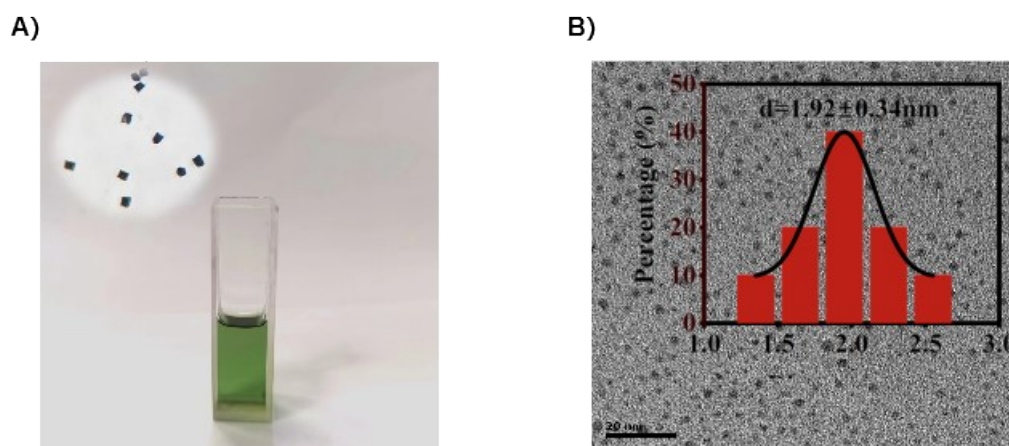

Fig. S1 The photos of (A)  $\text{Ag}_{15}\text{Cu}_{12}$  cluster dissolved in dichloromethane and crystals (insert of A). (B) Representative TEM images of  $\text{Ag}_{15}\text{Cu}_{12}$ . Insert of (B) the corresponding histogram of  $\text{Ag}_{15}\text{Cu}_{12}$  nanocluster.

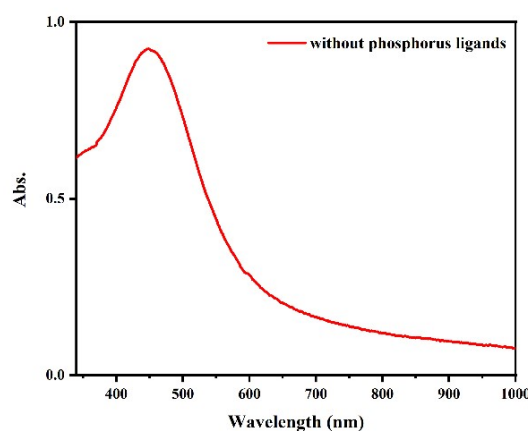

Fig. S2 The UV-vis spectrum of product synthesized without phosphorus ligands during the synthesis process.

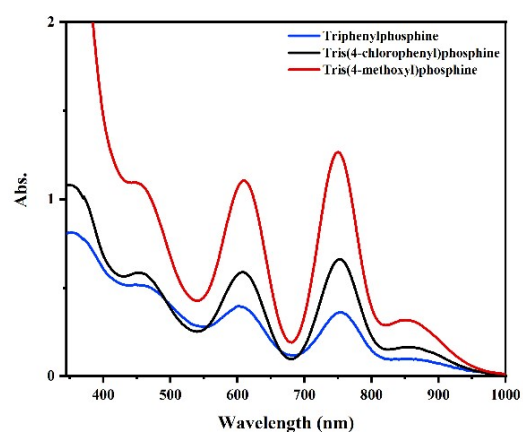

Fig. S3 The UV-Vis spectra of crude product synthesized via adding phosphine ligands with different substituting group.

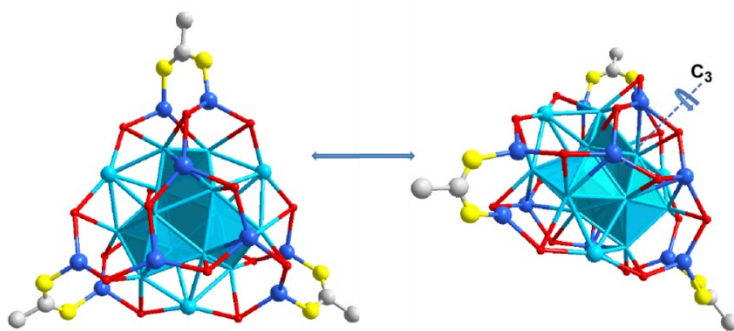

Fig. S4 Illustration of the  $C_3$  axial symmetry in  $Ag_{15}Cu_{12}$ . For clarity, hydrogen atoms and a part of carbon atoms are omitted. Color labels: sky blue = Ag; blue = Cu; red = S; yellow = O; and gray = C. All hydrogen atoms are omitted for clarity.

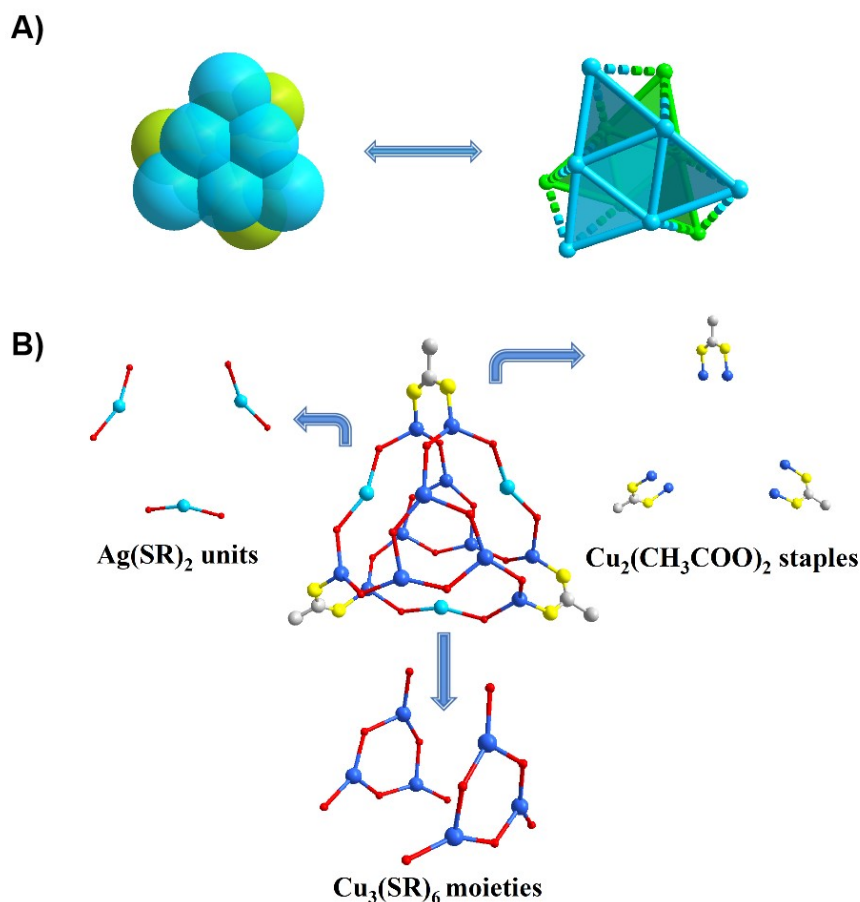

Fig. S5 Detailed structure analysis of (A)  $\text{Ag}_{12}$  core, two  $\text{Ag}_6$  facets are cross interconnected in a slightly angular twist. (B)  $\text{Ag}_3\text{Cu}_{12}(\text{SR})_{18}(\text{CH}_3\text{COO})_3$  shell, two  $\text{Cu}_3(\text{SR})_6$  moieties, three monomeric  $[-\text{SR}-\text{Ag}-\text{SR}-]$  units and three  $\text{Cu}_2(\text{CH}_3\text{COO})_2$  staples. Color labels: sky blue and light green = Ag, blue = Cu; red = S; yellow = O; and gray = C. All hydrogen atoms are omitted for clarity.

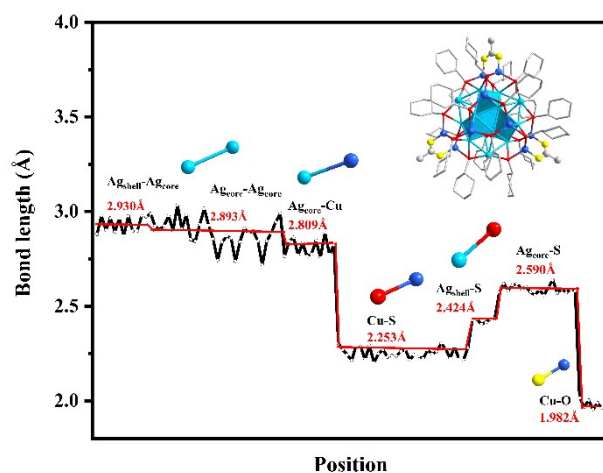

Fig. S6 Bond lengths of the  $\text{Ag}_{15}\text{Cu}_{12}$  nanocluster. Color label: sky blue = Ag; blue = Cu; red = S; yellow = O; and gray = C.

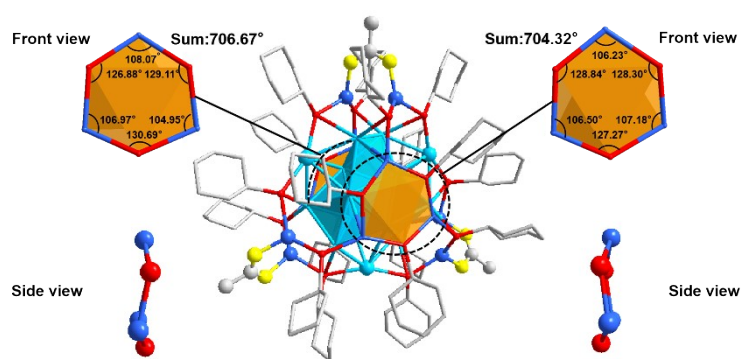

Fig. S7 The detailed angles in the  $\text{Cu}_3(\text{SR})_3$  structures of  $\text{Ag}_{15}\text{Cu}_{12}$  nanocluster. Color labels: sky blue = Ag; blue = Cu; red = S; yellow = O; and gray = C.

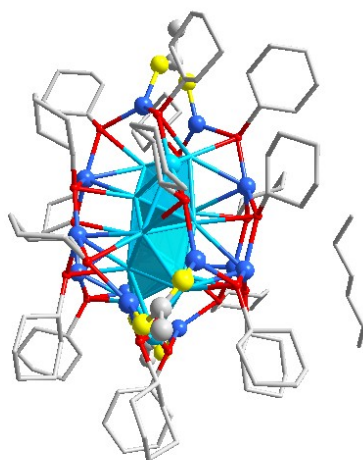

Fig. S8 The entire structure of  $\text{Ag}_{15}\text{Cu}_{12}$  nanocluster with one hexane solvent molecule around. Color labels: sky blue = Ag; blue = Cu; red = S; yellow = O; and gray = C.

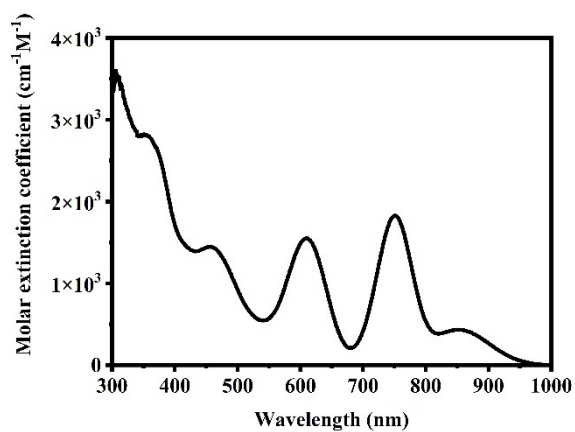

Fig. S9 Molar extinction coefficients of  $\text{Ag}_{15}\text{Cu}_{12}$ .

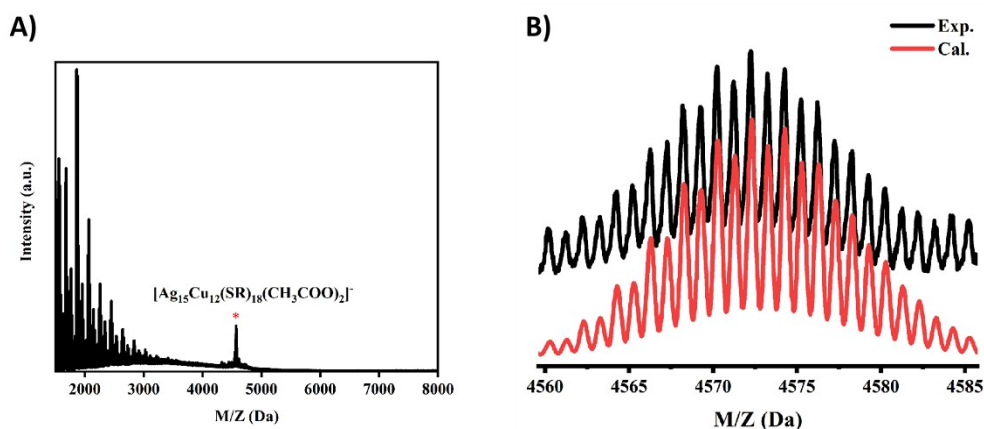

Fig.S10 (A) ESI mass spectrum in full width and (B) matching of isotope patterns between the experimental and simulated spectra of  $\text{Ag}_{15}\text{Cu}_{12}$ .

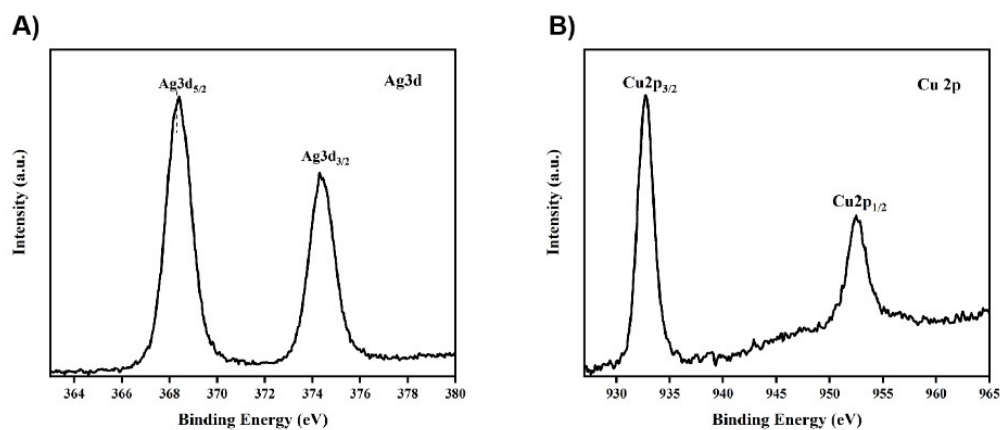

Fig.S11 (A) The High-resolution XPS spectra of Ag 3d of  $\text{Ag}_{15}\text{Cu}_{12}$ . (B) The High-resolution XPS spectra of Cu 2p of  $\text{Ag}_{15}\text{Cu}_{12}$ .

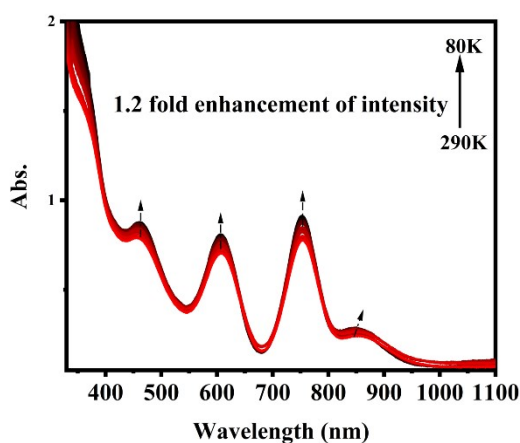

Fig.S12 Temperature-dependent UV-vis absorption of  $\text{Ag}_{15}\text{Cu}_{12}$  in  $\text{CH}_2\text{Cl}_2$ .

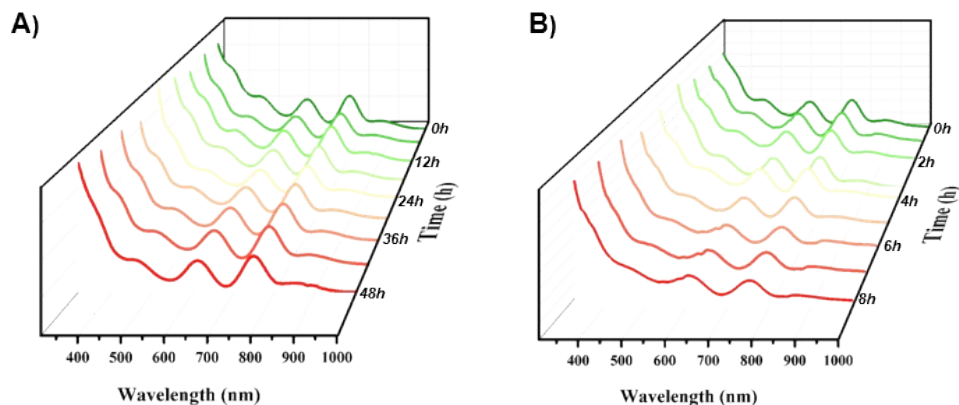

Fig.S13 Time-dependent UV-vis spectra (A) UV-vis spectra at room temperature (dissolved in  $\text{CH}_2\text{Cl}_2$ ), and (B) at  $45^\circ\text{C}$  (dissolved in  $\text{CHCl}_3$ ).

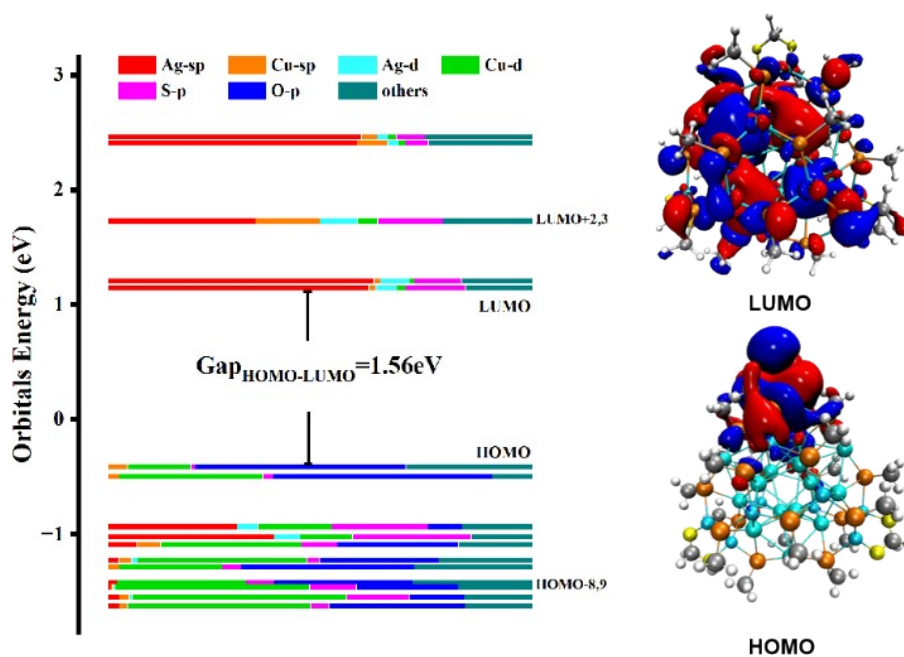

Fig.S14 Kohn-Sham (KS) orbital energy levels and the electron density profile of the HOMO and LUMO of  $\text{Ag}_{15}\text{Cu}_{12}$ . Color labels: sky blue = Ag; lake blue = Cu; orange = S; yellow = O; and gray = C.

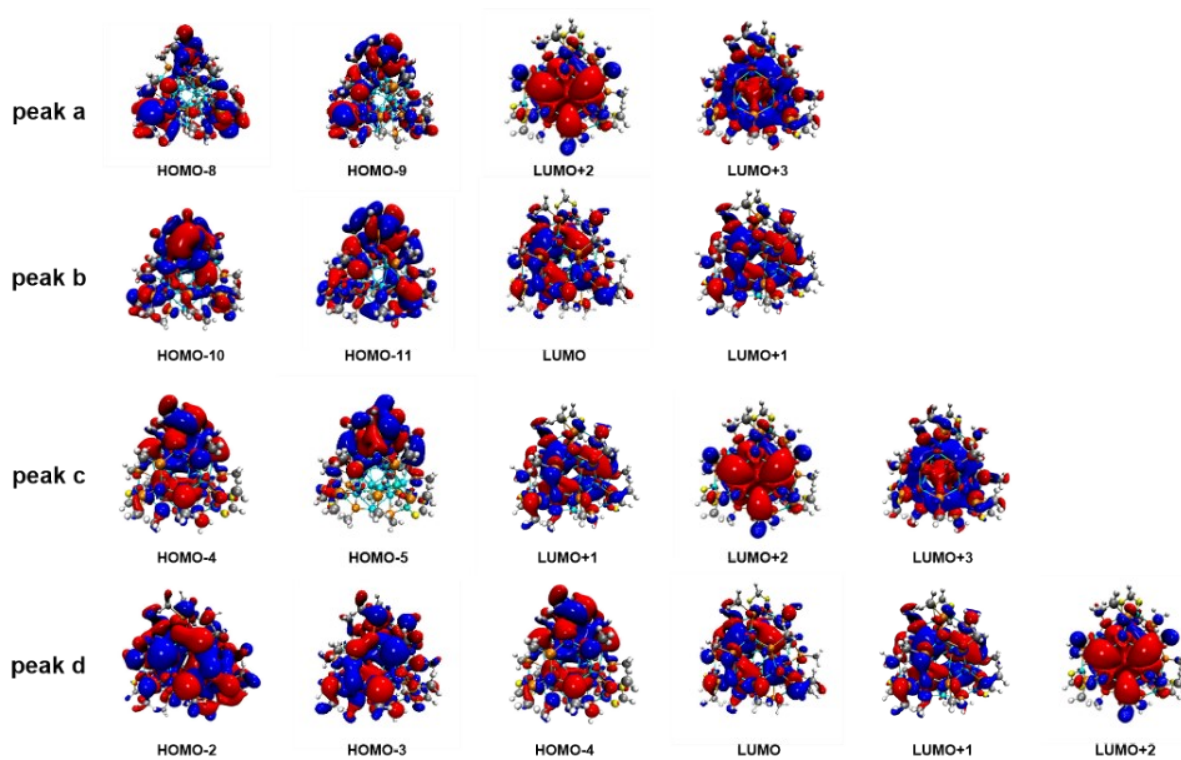

Fig.S15 Transition involved frontier molecular orbitals of  $\text{Ag}_{15}\text{Cu}_{12}^{\text{T}}$ .

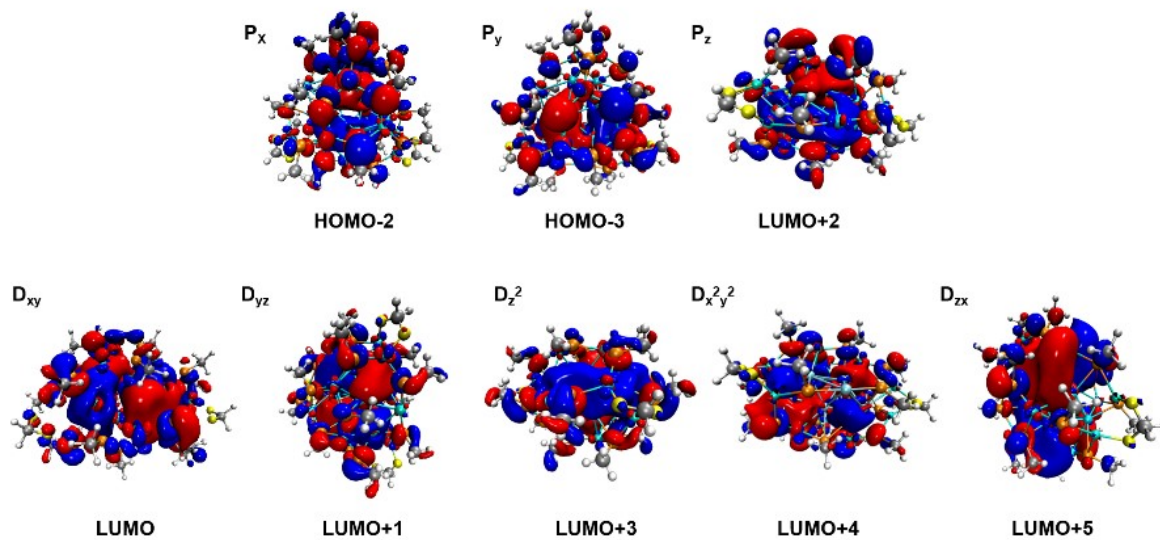

Fig.S16 Superatomic orbitals of  $\text{Ag}_{15}\text{Cu}_{12}^{\text{T}}$ .

Table S1. The comparison of the bond length of the icosahedral Ag<sub>13</sub> metal core and Ag<sub>12</sub> core of Ag<sub>15</sub>Cu<sub>12</sub>.

| Cluster                                                                                 | Core                         | Average bond length |
|-----------------------------------------------------------------------------------------|------------------------------|---------------------|
| [Ag <sub>25</sub> (SR) <sub>18</sub> ] <sup>-</sup>                                     | icosahedral Ag <sub>13</sub> | 2.866 Å             |
| Ag <sub>29</sub> (SR) <sub>12</sub> (PPh <sub>3</sub> ) <sub>4</sub>                    | icosahedral Ag <sub>13</sub> | 2.868 Å             |
| Ag <sub>15</sub> Cu <sub>12</sub> (SR) <sub>18</sub> (CH <sub>3</sub> COO) <sub>3</sub> | irregular Ag <sub>12</sub>   | 2.893 Å             |
| Ag <sub>27</sub> H <sub>11</sub> (SR) <sub>12</sub> (DPPM) <sub>6</sub>                 | twisted Ag <sub>13</sub>     | 2.993 Å             |

Table S2. Crystal Data and Structure Refinement of the Ag<sub>15</sub>Cu<sub>12</sub>(SR)<sub>18</sub>(CH<sub>3</sub>COO)<sub>3</sub> (C<sub>6</sub>H<sub>14</sub>) nanocluster.

| Ellipsoid plot                       | ADPs                                                                                               |
|--------------------------------------|----------------------------------------------------------------------------------------------------|
|                                      |                                                                                                    |
| Identification code                  | lzz-revised sq                                                                                     |
| Empirical formula                    | C <sub>120</sub> H <sub>221</sub> Ag <sub>15</sub> Cu <sub>12</sub> O <sub>6</sub> S <sub>18</sub> |
| Formula weight                       | 4717.57                                                                                            |
| Temperature/K                        | 120                                                                                                |
| Crystal system                       | triclinic                                                                                          |
| Space group                          | P-1                                                                                                |
| a/Å                                  | 17.4880(12)                                                                                        |
| b/Å                                  | 17.6703(12)                                                                                        |
| c/Å                                  | 30.473(2)                                                                                          |
| α/°                                  | 90.275(5)                                                                                          |
| β/°                                  | 96.680(5)                                                                                          |
| γ/°                                  | 93.511(5)                                                                                          |
| Volume/Å <sup>3</sup>                | 9334.6(11)                                                                                         |
| Z                                    | 2                                                                                                  |
| ρ <sub>calc</sub> /g/cm <sup>3</sup> | 1.678                                                                                              |
| μ/mm <sup>-1</sup>                   | 15.873                                                                                             |
| F(000)                               | 4656.0                                                                                             |
| Crystal size/mm <sup>3</sup>         | 0.02 × 0.01 × 0.01                                                                                 |
| Radiation                            | CuKα (λ = 1.54186)                                                                                 |
| 2θ range for data collection/°       | 6.924 to 124.996                                                                                   |
| Index ranges                         | -19 ≤ h ≤ 20, -20 ≤ k ≤ 7, -35 ≤ l ≤ 33                                                            |
| Reflections collected                | 56338                                                                                              |
| Independent reflections              | 28534 [R <sub>int</sub> = 0.0693, R <sub>sigma</sub> = 0.0818]                                     |



|                                             |                                                   |
|---------------------------------------------|---------------------------------------------------|
| Data/restraints/parameters                  | 28534/913/1543                                    |
| Goodness-of-fit on F <sup>2</sup>           | 0.993                                             |
| Final R indexes [I>2σ(I)]                   | R <sub>1</sub> = 0.0772, wR <sub>2</sub> = 0.1997 |
| Final R indexes [all data]                  | R <sub>1</sub> = 0.1055, wR <sub>2</sub> = 0.2341 |
| Largest diff. peak/hole / e Å <sup>-3</sup> | 2.67/-2.47                                        |
